# Supplementary material for: Coupled-cluster and density functional theory studies of the electronic 0–0 transitions of the DNA bases
Source: Royal Society of Chemistry journal article supplement (doi:10.1039/c3cp55080j), 2014-01-01
Supplement: c3cp55080j1.pdf [file c3cp55080j1.pdf]

# Coupled-cluster and density functional theory studies of the electronic 0–0 transitions of the DNA bases

Vasily A. Ovchinnikov,<sup>\*ab</sup> Dage Sundholm,<sup>a</sup>

Received Xth XXXXXXXXXXXX 20XX, Accepted Xth XXXXXXXXXXXX 20XX

First published on the web Xth XXXXXXXXXXXX 200X

DOI: 10.1039/b000000x

## 1 Adenine

### 1.1 Cartesian coordinates of the adenine ground state tautomers optimized at the B3LYP/def2-TZVPPD level.

|      |            |            |            |      |            |            |            |
|------|------------|------------|------------|------|------------|------------|------------|
|      |            |            |            | H    | 2.0141235  | -2.5622085 | -0.0217971 |
|      |            |            |            | H    | -1.2647223 | 2.2936672  | -0.1270719 |
|      |            |            |            | H    | -3.3556002 | 0.9019485  | 0.0599459  |
|      |            |            |            | (A3) |            |            |            |
| (A1) |            |            |            | C    | 1.2010748  | 0.6828748  | -0.0424906 |
| C    | 1.2017051  | 0.5658856  | -0.0383836 | C    | -0.2193593 | 0.4254081  | -0.0076234 |
| C    | -0.1960253 | 0.4146295  | -0.0061683 | C    | -0.6715640 | -0.8816188 | 0.0199747  |
| C    | -0.6701850 | -0.8958114 | 0.0184301  | N    | 0.0661926  | -2.0270719 | 0.0197103  |
| N    | 0.0657966  | -2.0073865 | 0.0160883  | N    | -1.2715720 | 1.3070532  | 0.0034160  |
| N    | -1.2385411 | 1.3221402  | 0.0070219  | N    | -2.0369853 | -0.7868151 | 0.0480575  |
| N    | -2.0380399 | -0.7688963 | 0.0457829  | C    | -2.3402285 | 0.5528217  | 0.0366412  |
| C    | -2.3114941 | 0.5798205  | 0.0375315  | C    | 1.3403944  | -1.7856230 | -0.0111974 |
| C    | 1.3674598  | -1.7328008 | -0.0127029 | N    | 1.9016162  | -0.5492555 | -0.0403850 |
| N    | 1.9637425  | -0.5349505 | -0.0390425 | N    | 1.8804451  | 1.7604399  | -0.0728657 |
| N    | 1.7978768  | 1.7765526  | -0.0785904 | H    | 2.0389786  | -2.6135483 | -0.0151143 |
| H    | 2.7999134  | 1.8288640  | -0.0410014 | H    | -2.6803878 | -1.5601135 | 0.0722536  |
| H    | 1.2469797  | 2.6131237  | -0.0171800 | H    | -3.3578364 | 0.9071337  | 0.0538955  |
| H    | 2.0356847  | -2.5860751 | -0.0144247 | H    | 1.2640051  | 2.5676200  | -0.0711995 |
| H    | -2.7008644 | -1.5252413 | 0.0673968  | H    | 2.9073965  | -0.4623146 | -0.0632630 |
| H    | -3.3240095 | 0.9501495  | 0.0552423  | (A4) |            |            |            |
| (A2) |            |            |            | C    | 1.2675899  | 0.6878695  | -0.0438696 |
| C    | 1.2260926  | 0.5952030  | -0.0791807 | C    | -0.1387981 | 0.4319180  | -0.0085495 |
| C    | -0.1632816 | 0.4469880  | -0.0260146 | C    | -0.6860371 | -0.8403771 | 0.0210195  |
| C    | -0.7003221 | -0.8474921 | 0.0476782  | N    | 0.0648029  | -1.9903137 | 0.0197930  |
| N    | 0.0567634  | -1.9515564 | 0.0546884  | N    | -1.2012262 | 1.2931142  | 0.0031725  |
| N    | -1.2554449 | 1.2947051  | -0.0209739 | N    | -2.0530406 | -0.7692565 | 0.0502436  |
| N    | -2.0780275 | -0.7864653 | 0.0971549  | C    | -2.3224744 | 0.5163057  | 0.0384631  |
| C    | -2.3598656 | 0.4864334  | 0.0481744  | C    | 1.3345011  | -1.7836393 | -0.0114686 |
| C    | 1.3536798  | -1.7026428 | -0.0168594 | N    | 1.9446403  | -0.5498836 | -0.0419869 |
| N    | 1.9684936  | -0.5085698 | -0.0769310 | N    | 1.7918599  | 1.8568990  | -0.0720736 |
| N    | 1.8659163  | 1.8075428  | -0.1847998 | H    | 2.0188636  | -2.6244864 | -0.0153204 |
| H    | 2.8638160  | 1.7597682  | -0.0475032 | H    | -1.1419496 | 2.2978140  | -0.0120733 |
| H    | 1.4257984  | 2.6181175  | 0.2166697  | H    | -3.3116319 | 0.9443727  | 0.0542161  |
|      |            |            |            | H    | 2.9522149  | -0.5238277 | -0.0649331 |
|      |            |            |            | H    | 2.8081142  | 1.8410808  | -0.0948727 |
|      |            |            |            | (A5) |            |            |            |
|      |            |            |            | C    | 1.2438559  | 0.6902447  | -0.0493942 |

<sup>a</sup> University of Helsinki, P.O. Box 55 (A.I. Virtanens plats 1), 00014 Helsinki, Finland. Fax: +358 919150279; Tel: +358 449651689; E-mail: vasily@chem.helsinki.fi, Dage.Sundholm@helsinki.fi

<sup>b</sup> Emanuel Institute of Biochemical Physics RAS, Kosygin street 4, 119334 Moscow, Russia.

|   |            |            |            |
|---|------------|------------|------------|
| C | -0.1670011 | 0.4351816  | -0.0115245 |
| C | -0.6993247 | -0.8469893 | 0.0229143  |
| N | 0.0558763  | -1.9904521 | 0.0243282  |
| N | -1.2513497 | 1.2790144  | -0.0001048 |
| N | -2.0682374 | -0.7961738 | 0.0544729  |
| C | -2.3594865 | 0.4815405  | 0.0397061  |
| C | 1.3269984  | -1.7722638 | -0.0095843 |
| N | 1.9198529  | -0.5413434 | -0.0445358 |
| N | 1.9409309  | 1.7662369  | -0.0842908 |
| H | 2.0163161  | -2.6086638 | -0.0118501 |
| H | -1.2406871 | 2.2843627  | -0.0175801 |
| H | -3.3548610 | 0.8954390  | 0.0563769  |
| H | 2.9268931  | -0.4741703 | -0.0694962 |
| H | 1.3618633  | 2.5988260  | -0.0852176 |

(A6)

|   |            |            |            |
|---|------------|------------|------------|
| C | 1.2300627  | 0.6983776  | -0.0437013 |
| C | -0.1942887 | 0.4472541  | -0.0084730 |
| C | -0.6517567 | -0.8601831 | 0.0193168  |
| N | 0.0745788  | -2.0143632 | 0.0192133  |
| N | -1.2483115 | 1.3269947  | 0.0025402  |
| N | -2.0159731 | -0.7662864 | 0.0476702  |
| C | -2.3162039 | 0.5740454  | 0.0359447  |
| C | 1.3474406  | -1.7893838 | -0.0115815 |
| N | 1.9207523  | -0.5520763 | -0.0412234 |
| N | 1.7958793  | 1.8394915  | -0.0727225 |
| H | 2.0399463  | -2.6229129 | -0.0149821 |
| H | -2.6579478 | -1.5405458 | 0.0720796  |
| H | -3.3334467 | 0.9299665  | 0.0530945  |
| H | 2.9278350  | -0.5057881 | -0.0639644 |
| H | 2.8114227  | 1.7775606  | -0.0946412 |

**1.2 Cartesian coordinates of the adenine first excited state tautomers optimized at the B3LYP/def2-TZVPPD level.**

(A1)

|   |            |            |            |
|---|------------|------------|------------|
| C | 1.2136384  | 0.5661857  | -0.1042607 |
| C | -0.2258330 | 0.4445716  | -0.0493864 |
| C | -0.6938498 | -0.8859559 | 0.0155879  |
| N | 0.0853273  | -1.9510773 | 0.0190388  |
| N | -1.2361909 | 1.3186343  | -0.0332504 |
| N | -2.0484803 | -0.7665164 | 0.0651047  |
| C | -2.3520450 | 0.6086032  | 0.0372008  |
| C | 1.4569200  | -1.8025567 | -0.0067108 |
| N | 1.8988928  | -0.5538530 | -0.0803088 |
| N | 1.8244999  | 1.7993788  | -0.2261121 |
| H | 2.7773045  | 1.8508039  | 0.0995118  |
| H | 1.2484678  | 2.5705474  | 0.0768930  |
| H | 2.1137212  | -2.6506965 | 0.0049862  |
| H | -2.7031457 | -1.5271651 | 0.1214581  |
| H | -3.3592278 | 0.9791001  | 0.0602479  |

(A2)

|   |            |            |            |
|---|------------|------------|------------|
| C | 1.1914815  | 0.5991339  | -0.1088967 |
| C | -0.1841798 | 0.4591643  | -0.0503860 |
| C | -0.7650906 | -0.8346693 | 0.0702078  |
| N | 0.1281155  | -1.8643568 | 0.0291439  |
| N | -1.2643924 | 1.3159358  | -0.0240172 |
| N | -2.0839251 | -0.7865262 | 0.1374219  |
| C | -2.4156224 | 0.5143492  | 0.0433855  |
| C | 1.4409331  | -1.7252188 | -0.0189261 |
| N | 1.9803464  | -0.5305072 | -0.1145481 |
| N | 1.8464306  | 1.8268957  | -0.1871473 |
| H | 2.8442587  | 1.7389959  | -0.0589521 |
| H | 1.4640930  | 2.5524960  | 0.4054814  |
| H | 2.0642604  | -2.6080672 | -0.0085604 |
| H | -1.2472851 | 2.2664336  | -0.3508682 |
| H | -3.4020042 | 0.9213801  | 0.1598417  |

(A3)

|   |            |            |            |
|---|------------|------------|------------|
| C | 1.1754866  | 0.6070643  | -0.0146098 |
| C | -0.1862231 | 0.4095841  | 0.1975919  |
| C | -0.6755219 | -0.9447833 | 0.0610010  |
| N | 0.0316847  | -2.0303653 | -0.0146774 |
| N | -1.2342622 | 1.3138511  | 0.1745710  |
| N | -2.0379441 | -0.7812150 | -0.0353568 |
| C | -2.2988102 | 0.5862777  | 0.0550373  |
| C | 1.3845684  | -1.8011000 | 0.1613604  |
| N | 1.9207050  | -0.5279451 | -0.0938356 |
| N | 1.8268480  | 1.7688847  | -0.1954400 |
| H | 2.0733450  | -2.6258725 | 0.0973307  |
| H | -2.7109663 | -1.5217032 | -0.1345038 |
| H | -3.3097916 | 0.9620191  | 0.0309093  |
| H | 1.1591830  | 2.5308881  | -0.0748806 |
| H | 2.9038688  | -0.4085940 | -0.2846876 |

(A4)

|   |            |            |            |
|---|------------|------------|------------|
| C | 1.2363327  | 0.6264870  | 0.0228961  |
| C | -0.1171405 | 0.4003874  | 0.3018047  |
| C | -0.6936346 | -0.8953741 | -0.0200270 |
| N | 0.0455362  | -1.9646676 | -0.1617548 |
| N | -1.1823435 | 1.2846964  | 0.2293251  |
| N | -2.0420917 | -0.7387108 | -0.2544431 |
| C | -2.2790026 | 0.5374682  | -0.0757232 |
| C | 1.3619786  | -1.7628744 | 0.1912016  |
| N | 1.9682871  | -0.5363117 | -0.0898313 |
| N | 1.7392567  | 1.8413998  | -0.1341914 |
| H | 2.0143040  | -2.6078896 | 0.3363394  |
| H | -1.1370186 | 2.2822696  | 0.3443829  |
| H | -3.2580159 | 0.9875362  | -0.1453013 |
| H | 2.9436048  | -0.4724286 | -0.3416899 |
| H | 2.7273763  | 1.8056022  | -0.3812277 |

(A5)

|   |            |            |            |   |            |            |            |
|---|------------|------------|------------|---|------------|------------|------------|
| C | 1.2153334  | 0.6229335  | -0.0587487 | H | 1.3843015  | 2.3442409  | -0.6982108 |
| C | -0.1457557 | 0.4207349  | -0.2875213 | H | 1.8854395  | -1.1239116 | -0.2327583 |
| C | -0.6995388 | -0.8916049 | 0.0430472  | H | 0.1837839  | -2.7480913 | -0.3194147 |
| N | 0.0332262  | -1.9606972 | 0.1462397  | H | -2.7384142 | -0.0088945 | 0.1559242  |
| N | -1.2264016 | 1.2984867  | -0.1407831 |   |            |            |            |
| N | -2.0479166 | -0.7519673 | 0.3205188  |   |            |            |            |
| C | -2.3081398 | 0.5135365  | 0.1579422  |   |            |            |            |
| C | 1.3479956  | -1.7729107 | -0.2147631 |   |            |            |            |
| N | 1.9464131  | -0.5302177 | 0.0063421  |   |            |            |            |
| N | 1.8985663  | 1.7576787  | 0.1350148  |   |            |            |            |
| H | 2.0080669  | -2.6207344 | -0.2864245 |   |            |            |            |
| H | -1.2891337 | 2.2392155  | -0.4893402 |   |            |            |            |
| H | -3.2939212 | 0.9468554  | 0.2448934  |   |            |            |            |
| H | 2.9324815  | -0.4317431 | 0.1948374  |   |            |            |            |
| H | 1.2803637  | 2.5612238  | 0.0429654  |   |            |            |            |

**(A6)**

|   |            |            |            |
|---|------------|------------|------------|
| C | 1.1978457  | 0.6255187  | 0.0297915  |
| C | -0.1690879 | 0.4226831  | 0.2342178  |
| C | -0.6604487 | -0.9269099 | 0.0405382  |
| N | 0.0426081  | -2.0180118 | -0.0546960 |
| N | -1.2218865 | 1.3218216  | 0.2347997  |
| N | -2.0152105 | -0.7633191 | -0.0823025 |
| C | -2.2813373 | 0.5999019  | 0.0673266  |
| C | 1.3856342  | -1.7918191 | 0.1756419  |
| N | 1.9345413  | -0.5274698 | -0.0801906 |
| N | 1.7575048  | 1.8368463  | -0.0714141 |
| H | 2.0746398  | -2.6190561 | 0.1710992  |
| H | -2.6829252 | -1.5044684 | -0.2093460 |
| H | -3.2934799 | 0.9731003  | 0.0478000  |
| H | 2.9203621  | -0.4432120 | -0.2737482 |
| H | 2.7412294  | 1.7565451  | -0.3309475 |

## 2 Thymine

### 2.1 Cartesian coordinates of the thymine ground state tautomers optimized at the B3LYP/def2-TZVPPD level.

**(T1)**

|   |            |            |            |
|---|------------|------------|------------|
| C | -0.8714621 | 0.8617913  | 0.1463649  |
| C | 0.5453437  | 0.5096761  | 0.0269296  |
| C | 0.8615384  | -0.7888973 | -0.1367105 |
| N | -0.0846891 | -1.7860572 | -0.1954467 |
| N | -1.7547210 | -0.2257840 | 0.0760708  |
| C | -1.4461932 | -1.5607540 | -0.0929151 |
| C | 1.5563160  | 1.6117253  | 0.0921675  |
| O | -1.3011160 | 1.9893197  | 0.2958990  |
| O | -2.2718836 | -2.4472670 | -0.1468407 |
| H | 1.4831244  | 2.1517778  | 1.0375858  |
| H | 2.5686539  | 1.2211238  | -0.0086500 |

**(T2)**

|   |            |            |            |
|---|------------|------------|------------|
| C | -0.8707202 | 0.8761612  | 0.1471514  |
| C | 0.5293718  | 0.5090939  | 0.0266186  |
| C | 0.8381044  | -0.8055455 | -0.1387102 |
| N | -0.0663428 | -1.8353783 | -0.2027636 |
| N | -1.7412558 | -0.2330037 | 0.0730627  |
| C | -1.3078876 | -1.5003996 | -0.0939312 |
| C | 1.5483937  | 1.6031951  | 0.0921100  |
| O | -1.3280071 | 1.9948538  | 0.2981717  |
| O | -2.2880412 | -2.4146914 | -0.1398961 |
| H | 1.4820947  | 2.1426037  | 1.0388657  |
| H | 2.5563979  | 1.2031914  | -0.0123611 |
| H | 1.3804868  | 2.3402478  | -0.6954550 |
| H | 1.8745320  | -1.1091203 | -0.2320023 |
| H | -1.8636137 | -3.2749354 | -0.2605345 |
| H | -2.7308425 | -0.0423226 | 0.1508338  |

**(T3)**

|   |            |            |            |
|---|------------|------------|------------|
| C | -0.8710670 | 0.7286230  | 0.1143125  |
| C | 0.5427280  | 0.5092744  | 0.0215903  |
| C | 0.8795256  | -0.7965820 | -0.1339670 |
| N | -0.0690974 | -1.7624649 | -0.1900449 |
| N | -1.7944992 | -0.1848477 | 0.0637103  |
| C | -1.4556540 | -1.5087892 | -0.0935224 |
| C | 1.5368397  | 1.6295478  | 0.0918646  |
| O | -1.2613652 | 2.0050504  | 0.2677054  |
| O | -2.2395583 | -2.4328176 | -0.1520868 |
| H | 1.4606351  | 2.1714221  | 1.0361869  |
| H | 2.5534720  | 1.2469819  | 0.0008483  |
| H | 1.3741246  | 2.3569080  | -0.7053761 |
| H | -2.2288543 | 1.9962142  | 0.3143115  |
| H | 0.1838258  | -2.7313858 | -0.3059007 |
| H | 1.9070544  | -1.1241153 | -0.2198917 |

**(T4)**

|   |            |            |            |
|---|------------|------------|------------|
| C | -0.8667015 | 0.7479928  | 0.1151637  |
| C | 0.5142863  | 0.5094739  | 0.0229927  |
| C | 0.8377224  | -0.8258695 | -0.1343657 |
| N | -0.0621541 | -1.8153706 | -0.1944435 |
| N | -1.7834746 | -0.2026507 | 0.0599646  |
| C | -1.3294511 | -1.4421904 | -0.0925081 |
| C | 1.5287312  | 1.6112513  | 0.0912270  |
| O | -1.2958400 | 2.0127957  | 0.2685905  |
| O | -2.2694385 | -2.4003552 | -0.1465015 |
| H | 1.4655059  | 2.1541294  | 1.0361050  |
| H | 2.5371942  | 1.2092060  | -0.0033936 |

|   |            |            |            |   |            |            |            |
|---|------------|------------|------------|---|------------|------------|------------|
| H | 1.3770238  | 2.3426743  | -0.7047083 | H | 1.4076488  | 2.3354934  | -0.7193263 |
| H | -1.8038939 | -3.2393845 | -0.2571359 | H | -1.7956709 | -3.2327414 | -0.2578347 |
| H | -2.2618386 | 1.9822599  | 0.3125426  | H | -0.6555949 | 2.6401331  | 0.3157430  |
| H | 1.8781488  | -1.1230330 | -0.2174495 | H | 1.8801461  | -1.1162748 | -0.2233178 |

**(T5)**

|   |            |            |            |
|---|------------|------------|------------|
| C | -0.8721620 | 0.7531680  | 0.1133289  |
| C | 0.5057114  | 0.5110974  | 0.0236575  |
| C | 0.8259290  | -0.8272935 | -0.1345961 |
| N | -0.0670532 | -1.8208976 | -0.1991539 |
| N | -1.7846922 | -0.2035534 | 0.0542274  |
| C | -1.3292359 | -1.4495223 | -0.1000633 |
| C | 1.5243090  | 1.6095870  | 0.0933582  |
| O | -1.3029382 | 2.0184148  | 0.2672751  |
| O | -2.2475106 | -2.4292825 | -0.1612415 |
| H | 1.4624532  | 2.1531659  | 1.0380868  |
| H | 2.5310931  | 1.2027851  | 0.0007561  |
| H | 1.3779207  | 2.3411801  | -0.7036190 |
| H | -3.1161749 | -2.0178812 | -0.0761599 |
| H | -2.2684537 | 1.9930309  | 0.3097690  |
| H | 1.8675951  | -1.1219195 | -0.2152553 |

**(T6)**

|   |            |            |            |
|---|------------|------------|------------|
| C | -0.8904065 | 0.8446680  | 0.1297845  |
| C | 0.5459423  | 0.4943064  | 0.0217179  |
| C | 0.8829074  | -0.7964149 | -0.1423192 |
| N | -0.0910090 | -1.7766561 | -0.2077406 |
| N | -1.8125219 | -0.2098891 | 0.0560304  |
| C | -1.3912994 | -1.4104462 | -0.1013005 |
| C | 1.5503145  | 1.5988550  | 0.1004192  |
| O | -1.2583115 | 1.9955114  | 0.2765142  |
| O | -2.2401093 | -2.4509123 | -0.1764128 |
| H | 1.4543526  | 2.1356184  | 1.0456408  |
| H | 2.5691043  | 1.2214955  | 0.0092811  |
| H | 1.3722452  | 2.3334242  | -0.6866300 |
| H | 1.9017841  | -1.1453466 | -0.2319364 |
| H | 0.1429010  | -2.7476128 | -0.3291559 |
| H | -3.1308836 | -2.0840603 | -0.0915528 |

**(T7)**

|   |            |            |            |
|---|------------|------------|------------|
| C | -0.8757328 | 0.7539913  | 0.1249859  |
| C | 0.5084721  | 0.5105696  | 0.0248333  |
| C | 0.8384519  | -0.8234370 | -0.1362263 |
| N | -0.0575524 | -1.8115307 | -0.1952052 |
| N | -1.7849661 | -0.1994490 | 0.0708448  |
| C | -1.3272095 | -1.4338364 | -0.0871617 |
| C | 1.5347403  | 1.6056815  | 0.0863160  |
| O | -1.3720552 | 1.9978777  | 0.2851369  |
| O | -2.2628396 | -2.3953849 | -0.1424042 |
| H | 1.5021836  | 2.1492696  | 1.0356646  |
| H | 2.5388287  | 1.1940174  | -0.0113083 |

**(T8)**

|   |            |            |            |
|---|------------|------------|------------|
| C | -0.8777683 | 0.7617896  | 0.1244701  |
| C | 0.5026294  | 0.5135934  | 0.0252165  |
| C | 0.8277753  | -0.8239506 | -0.1363507 |
| N | -0.0622463 | -1.8157724 | -0.1968188 |
| N | -1.7834397 | -0.1967040 | 0.0690139  |
| C | -1.3258121 | -1.4379746 | -0.0892755 |
| C | 1.5325780  | 1.6052982  | 0.0875118  |
| O | -1.3779556 | 2.0045710  | 0.2841597  |
| O | -2.2434245 | -2.4168737 | -0.1465012 |
| H | 1.5019740  | 2.1488694  | 1.0369902  |
| H | 2.5349141  | 1.1893668  | -0.0095509 |
| H | 1.4092925  | 2.3357162  | -0.7182484 |
| H | -3.1099132 | -2.0005609 | -0.0555369 |
| H | -0.6624624 | 2.6480568  | 0.3153656  |
| H | 1.8703791  | -1.1150663 | -0.2229554 |

**(T9)**

|   |            |            |            |
|---|------------|------------|------------|
| C | -0.8946976 | 0.7422882  | 0.1327033  |
| C | 0.5259849  | 0.5218381  | 0.0284139  |
| C | 0.8736974  | -0.7801545 | -0.1360026 |
| N | -0.0670399 | -1.7481252 | -0.1911093 |
| N | -1.8051118 | -0.1775718 | 0.0820383  |
| C | -1.4573163 | -1.4955695 | -0.0840058 |
| C | 1.5312748  | 1.6355458  | 0.0960661  |
| O | -1.3560713 | 1.9993498  | 0.2982642  |
| O | -2.2316998 | -2.4268218 | -0.1433806 |
| H | 1.4917088  | 2.1695534  | 1.0504900  |
| H | 2.5435317  | 1.2458246  | -0.0082083 |
| H | 1.3882754  | 2.3691572  | -0.7033195 |
| H | -0.6266532 | 2.6270884  | 0.3261092  |
| H | 0.1879006  | -2.7158071 | -0.3137268 |
| H | 1.9037158  | -1.0984266 | -0.2300121 |

## 2.2 Cartesian coordinates of the thymine first excited state tautomers optimized at the B3LYP/def2-TZVPPD level.

**(T1)**

|   |            |            |            |
|---|------------|------------|------------|
| C | -0.8109291 | 0.7971114  | 0.1527611  |
| C | 0.5278791  | 0.5304962  | 0.0339246  |
| C | 0.8981715  | -0.8093655 | -0.1519580 |
| N | -0.0961201 | -1.7929032 | -0.2108214 |
| N | -1.7589648 | -0.2184828 | 0.0926440  |
| C | -1.4327202 | -1.5637556 | -0.0966056 |
| C | 1.5485822  | 1.6348190  | 0.0922281  |

---

|   |            |            |            |   |            |            |            |
|---|------------|------------|------------|---|------------|------------|------------|
| O | -1.3725529 | 1.9852611  | 0.3292000  | O | -1.3289037 | 2.0321767  | 0.0159065  |
| O | -2.2946909 | -2.4189775 | -0.1477398 | O | -2.3133917 | -2.4436361 | -0.1814648 |
| H | 1.4477389  | 2.2304195  | 1.0012828  | H | 2.1529496  | 1.5703616  | 1.0287407  |
| H | 2.5549053  | 1.2188382  | 0.0795439  | H | 2.2282873  | 1.5853884  | -0.7317441 |
| H | 1.4595081  | 2.3149264  | -0.7576851 | H | 1.0660432  | 2.6158869  | 0.1077144  |
| H | 1.9158932  | -1.1414162 | -0.2508898 | H | -1.8831783 | -3.3070703 | -0.1890188 |
| H | 0.1529316  | -2.7585068 | -0.3469159 | H | -2.2898056 | 1.9664020  | -0.0273921 |
| H | -2.7396097 | -0.0084662 | 0.1810261  | H | 1.9291137  | -1.1849871 | -0.0096912 |

**(T2)**

|   |            |            |            |
|---|------------|------------|------------|
| C | -0.8145174 | 0.7872911  | 0.2347754  |
| C | 0.5011894  | 0.5431942  | 0.0118103  |
| C | 0.8534529  | -0.8029962 | -0.3281631 |
| N | -0.0772805 | -1.7985929 | -0.3689768 |
| N | -1.7627028 | -0.2178458 | 0.0925464  |
| C | -1.2994055 | -1.5026378 | -0.1447548 |
| C | 1.5400250  | 1.6254982  | 0.1009665  |
| O | -1.3790388 | 1.9484547  | 0.5757872  |
| O | -2.2981341 | -2.4095163 | -0.1317731 |
| H | 1.1312076  | 2.5502875  | 0.5048195  |
| H | 2.3655846  | 1.3166224  | 0.7459282  |
| H | 1.9627857  | 1.8507456  | -0.8818122 |
| H | 1.8809862  | -1.0809347 | -0.5034277 |
| H | -1.8946960 | -3.2701102 | -0.3035741 |
| H | -2.6967857 | -0.0855096 | 0.4470084  |

**(T3)**

|   |            |            |            |
|---|------------|------------|------------|
| C | -0.8224955 | 0.7733120  | 0.0814276  |
| C | 0.5210340  | 0.5269963  | 0.0199150  |
| C | 0.9252309  | -0.8058534 | -0.1050002 |
| N | -0.0931321 | -1.7907495 | -0.1433729 |
| N | -1.8089494 | -0.2137475 | -0.0113386 |
| C | -1.3822530 | -1.4174278 | -0.1029557 |
| C | 1.5369399  | 1.6316246  | 0.1031798  |
| O | -1.3095267 | 2.0250590  | 0.2358764  |
| O | -2.2524914 | -2.4255872 | -0.1678250 |
| H | 1.6402528  | 1.9945877  | 1.1278573  |
| H | 2.5137924  | 1.2819677  | -0.2303046 |
| H | 1.2453235  | 2.4812256  | -0.5135867 |
| H | -2.2719059 | 1.9548655  | 0.2290775  |
| H | 0.1420225  | -2.7673277 | -0.1696658 |
| H | 1.9342680  | -1.1459258 | -0.2435443 |

**(T4)**

|   |            |            |            |
|---|------------|------------|------------|
| C | -0.8267792 | 0.7724122  | 0.0103534  |
| C | 0.5290382  | 0.5450454  | 0.0698274  |
| C | 0.9193897  | -0.8292830 | 0.0989996  |
| N | -0.1125677 | -1.7304657 | -0.0338270 |
| N | -1.7721735 | -0.2203733 | -0.0378646 |
| C | -1.3784797 | -1.4903882 | -0.0860935 |
| C | 1.5462780  | 1.6394601  | 0.1216338  |

**(T5)**

|   |            |            |            |
|---|------------|------------|------------|
| C | -0.8331088 | 0.7597830  | 0.1179078  |
| C | 0.5217224  | 0.5278899  | 0.0409171  |
| C | 0.9163546  | -0.8354886 | -0.0707412 |
| N | -0.1346636 | -1.7154213 | -0.1710036 |
| N | -1.8043169 | -0.2163277 | 0.0782695  |
| C | -1.3975042 | -1.4796858 | -0.0953322 |
| C | 1.5338531  | 1.6323073  | 0.0916124  |
| O | -1.2984231 | 2.0255916  | 0.2624982  |
| O | -2.2833929 | -2.4747850 | -0.1815936 |
| H | 1.4733825  | 2.1822241  | 1.0333240  |
| H | 2.5437517  | 1.2337777  | 0.0006316  |
| H | 1.3784755  | 2.3517441  | -0.7146403 |
| H | -3.1601051 | -2.0764364 | -0.1077425 |
| H | -2.2605517 | 1.9825096  | 0.3044212  |
| H | 1.9113173  | -1.1856032 | -0.2781583 |

**(T6)**

|   |            |            |            |
|---|------------|------------|------------|
| C | -0.8279546 | 0.7717185  | 0.0478693  |
| C | 0.5261340  | 0.5187561  | 0.0272199  |
| C | 0.9266414  | -0.8291040 | -0.0448392 |
| N | -0.0982706 | -1.7920712 | -0.1414494 |
| N | -1.8086068 | -0.1989708 | -0.0201366 |
| C | -1.3814761 | -1.4198356 | -0.1106089 |
| C | 1.5393362  | 1.6252449  | 0.1130957  |
| O | -1.3426178 | 1.9926917  | 0.1461551  |
| O | -2.2567944 | -2.4323910 | -0.1809895 |
| H | 1.7063800  | 1.9410205  | 1.1464850  |
| H | 2.4986943  | 1.3008123  | -0.2909385 |
| H | 1.2199136  | 2.5029067  | -0.4496959 |
| H | 1.9299284  | -1.1620370 | -0.2418857 |
| H | 0.1139257  | -2.7751408 | -0.1805262 |
| H | -3.1402232 | -2.0410599 | -0.1474150 |

**(T7)**

|   |            |            |            |
|---|------------|------------|------------|
| C | -0.8195277 | 0.7675826  | 0.1770543  |
| C | 0.5319929  | 0.5399077  | 0.0261497  |
| C | 0.9107819  | -0.8102259 | -0.1942761 |
| N | -0.1130158 | -1.7374354 | -0.2428416 |
| N | -1.7463068 | -0.2446839 | 0.1259012  |
| C | -1.3736554 | -1.4961883 | -0.0857990 |
| C | 1.5534010  | 1.6380475  | 0.0689043  |

|   |            |            |            |
|---|------------|------------|------------|
| O | -1.3880706 | 1.9804966  | 0.3876619  |
| O | -2.3153181 | -2.4434761 | -0.1322996 |
| H | 1.3415533  | 2.3710262  | 0.8531131  |
| H | 2.5391133  | 1.2280732  | 0.2904339  |
| H | 1.6278815  | 2.1728196  | -0.8824473 |
| H | -1.8869957 | -3.2931662 | -0.2937741 |
| H | -0.7030979 | 2.6558534  | 0.4053820  |
| H | 1.9201140  | -1.1542518 | -0.3324226 |

**(T8)**

|   |            |            |            |
|---|------------|------------|------------|
| C | -0.8327101 | 0.7670958  | 0.1739596  |
| C | 0.5207059  | 0.5367810  | 0.0355830  |
| C | 0.9083542  | -0.8206441 | -0.1542002 |
| N | -0.1344836 | -1.7110045 | -0.2437807 |
| N | -1.7831249 | -0.2217445 | 0.1350967  |
| C | -1.3917519 | -1.4764428 | -0.0976995 |
| C | 1.5502014  | 1.6278888  | 0.0736012  |
| O | -1.3798591 | 1.9917244  | 0.3785562  |
| O | -2.2862901 | -2.4634423 | -0.1764457 |
| H | 1.3382368  | 2.3684057  | 0.8510939  |
| H | 2.5319772  | 1.2146316  | 0.3057673  |
| H | 1.6336160  | 2.1554907  | -0.8810606 |
| H | -3.1565786 | -2.0639038 | -0.0476003 |
| H | -0.6837874 | 2.6556404  | 0.3996335  |
| H | 1.9020145  | -1.1601173 | -0.3850143 |

**(T9)**

|   |            |            |            |
|---|------------|------------|------------|
| C | -0.8373985 | 0.7750243  | 0.1289990  |
| C | 0.5075922  | 0.5309860  | 0.0299556  |
| C | 0.9210112  | -0.7957878 | -0.1338234 |
| N | -0.0899725 | -1.7817533 | -0.1890833 |
| N | -1.8107293 | -0.2176361 | 0.0648486  |
| C | -1.3801787 | -1.4103296 | -0.0839702 |
| C | 1.5290933  | 1.6351138  | 0.0961922  |
| O | -1.3874051 | 2.0014647  | 0.2997207  |
| O | -2.2458439 | -2.4234034 | -0.1484321 |
| H | 1.4960536  | 2.1615622  | 1.0540489  |
| H | 2.5357562  | 1.2351934  | -0.0160221 |
| H | 1.3830670  | 2.3712517  | -0.6989250 |
| H | -0.6944204 | 2.6675731  | 0.3439434  |
| H | 0.1460216  | -2.7534007 | -0.2883522 |
| H | 1.9348527  | -1.1276890 | -0.2547801 |

### 3 Cytosine

#### 3.1 Cartesian coordinates of the cytosine ground state tautomers optimized at the B3LYP/def2-TZVPPD level.

**(C1)**

|   |            |           |           |
|---|------------|-----------|-----------|
| C | -0.6120987 | 0.7028198 | 0.1135464 |
|---|------------|-----------|-----------|

|   |            |            |            |
|---|------------|------------|------------|
| C | 0.7018500  | 0.7633955  | -0.4640331 |
| C | 1.3821988  | -0.4052891 | -0.5235058 |
| N | -1.1579975 | -0.4023308 | 0.5713628  |
| N | 0.8201526  | -1.5399087 | -0.0555943 |
| C | -0.4824276 | -1.5886661 | 0.5151856  |
| N | -1.3529521 | 1.8353513  | 0.1888270  |
| O | -0.8995554 | -2.6597985 | 0.9092223  |
| H | -0.9698703 | 2.7308864  | -0.0474841 |
| H | -2.2435521 | 1.7880824  | 0.6529092  |
| H | 1.1278345  | 1.6825938  | -0.8343452 |
| H | 2.3785022  | -0.4860847 | -0.9364153 |
| H | 1.3079225  | -2.4210442 | -0.0896792 |

**(C2)**

|   |            |            |            |
|---|------------|------------|------------|
| C | -0.6038170 | 0.7215837  | 0.0888625  |
| C | 0.6901857  | 0.7550341  | -0.4669156 |
| C | 1.3681313  | -0.4423770 | -0.5046103 |
| N | -1.1311073 | -0.4147814 | 0.5531331  |
| N | 0.8549325  | -1.5913573 | -0.0478643 |
| C | -0.3737333 | -1.4964750 | 0.4548308  |
| N | -1.3898599 | 1.8285367  | 0.1591664  |
| O | -0.9243782 | -2.6282737 | 0.9271900  |
| H | -1.0000442 | 2.7392776  | 0.0026292  |
| H | -2.2440273 | 1.7599227  | 0.6850880  |
| H | 1.1268626  | 1.6671056  | -0.8472008 |
| H | 2.3692232  | -0.4965211 | -0.9176745 |
| H | -0.2706376 | -3.3270546 | 0.7954453  |

**(C3)**

|   |            |            |            |
|---|------------|------------|------------|
| C | -0.6102873 | 0.7255665  | 0.0885214  |
| C | 0.6811252  | 0.7497028  | -0.4675280 |
| C | 1.3555421  | -0.4519733 | -0.4973171 |
| N | -1.1322830 | -0.4115371 | 0.5579516  |
| N | 0.8484837  | -1.6010366 | -0.0362645 |
| C | -0.3734386 | -1.5019723 | 0.4639908  |
| N | -1.3971065 | 1.8348177  | 0.1510050  |
| O | -0.9061575 | -2.6428804 | 0.9356003  |
| H | -0.9946066 | 2.7425830  | 0.0073474  |
| H | -2.2392833 | 1.7772174  | 0.6971026  |
| H | 1.1199883  | 1.6580042  | -0.8543473 |
| H | 2.3565072  | -0.5071492 | -0.9113007 |
| H | -1.7889228 | -2.4283226 | 1.2621882  |

**(C4)**

|   |            |            |            |
|---|------------|------------|------------|
| C | -0.6345276 | 0.8167382  | 0.0972808  |
| C | 0.7044807  | 0.7664348  | -0.4714880 |
| C | 1.3695279  | -0.3987012 | -0.5217898 |
| N | 0.8202936  | -1.5649545 | -0.0462816 |
| C | -0.4490665 | -1.6345081 | 0.5171525  |
| N | -1.4141204 | 1.8196739  | 0.2290317  |
| O | -0.9193121 | -2.6731017 | 0.9317493  |

|   |            |            |            |
|---|------------|------------|------------|
| H | 1.1490293  | 1.6737720  | -0.8482561 |
| H | 2.3646149  | -0.4854259 | -0.9346100 |
| H | 1.3207887  | -2.4366544 | -0.0863961 |
| N | -1.1004876 | -0.4258955 | 0.5536920  |
| H | -2.0263591 | -0.4372390 | 0.9567237  |
| H | -0.9856418 | 2.6669420  | -0.1298984 |

**(C5)**

|   |            |            |            |
|---|------------|------------|------------|
| C | -0.6257803 | 0.8545763  | 0.1159609  |
| C | 0.7019095  | 0.7838729  | -0.4716196 |
| C | 1.3564112  | -0.3846341 | -0.5258649 |
| N | 0.8050316  | -1.5489182 | -0.0337746 |
| C | -0.4497620 | -1.6063029 | 0.5469186  |
| N | -1.2767072 | 1.9508897  | 0.1837922  |
| O | -0.9312678 | -2.6334894 | 0.9781798  |
| H | 1.1320689  | 1.6937794  | -0.8554308 |
| H | 2.3437458  | -0.4826657 | -0.9533606 |
| H | 1.2998936  | -2.4236049 | -0.0776274 |
| N | -1.0969498 | -0.3876341 | 0.5876600  |
| H | -2.0121551 | -0.4256637 | 1.0108355  |
| H | -2.1900683 | 1.8423655  | 0.6201506  |

**(C6)**

|   |            |            |            |
|---|------------|------------|------------|
| C | -0.6177618 | 0.7898172  | 0.0700696  |
| C | 0.6571359  | 0.7828880  | -0.4594594 |
| C | 1.3238570  | -0.4529289 | -0.4776932 |
| N | 0.8572728  | -1.5978439 | -0.0380105 |
| C | -0.4044979 | -1.6305942 | 0.4954460  |
| N | -1.4257066 | 1.8871533  | 0.1255958  |
| O | -0.9726039 | -2.6068909 | 0.9386652  |
| H | -1.0022120 | 2.7833134  | -0.0407046 |
| H | -2.2078586 | 1.8924769  | 0.7581968  |
| N | -1.1076173 | -0.3846565 | 0.5260461  |
| H | -2.0427115 | -0.4487213 | 0.9020860  |
| H | 2.3293057  | -0.4834481 | -0.8907223 |
| H | 1.1135191  | 1.6832345  | -0.8397859 |

**(C7)**

|   |            |            |            |
|---|------------|------------|------------|
| C | -0.6329557 | 0.8283215  | 0.0934931  |
| C | 0.6996384  | 0.7602814  | -0.4707149 |
| C | 1.3639919  | -0.4184698 | -0.5055771 |
| N | 0.8638823  | -1.6095761 | -0.0316292 |
| C | -0.3256890 | -1.5447774 | 0.4723625  |
| N | -1.4392042 | 1.8111790  | 0.2309881  |
| O | -0.9242201 | -2.6361350 | 0.9686723  |
| H | 1.1443779  | 1.6648267  | -0.8585482 |
| H | 2.3602122  | -0.4774678 | -0.9259180 |
| N | -1.0734152 | -0.4277162 | 0.5571017  |
| H | -1.9960645 | -0.4658253 | 0.9670347  |
| H | -1.0343314 | 2.6684198  | -0.1308195 |
| H | -0.3032922 | -3.3688198 | 0.8571841  |

**(C8)**

|   |            |            |            |
|---|------------|------------|------------|
| C | -0.6486315 | 0.7815552  | 0.1208638  |
| C | 0.6961637  | 0.7564024  | -0.4576666 |
| C | 1.3811876  | -0.3912471 | -0.5260360 |
| N | 0.8142592  | -1.5635923 | -0.0463698 |
| C | -0.4378399 | -1.5040277 | 0.4849267  |
| N | -1.3047587 | 1.8768755  | 0.1877003  |
| O | -0.8763898 | -2.7019402 | 0.9138339  |
| H | 1.1153025  | 1.6805187  | -0.8234166 |
| H | 2.3744533  | -0.4828360 | -0.9386466 |
| H | 1.2976357  | -2.4442917 | -0.0804325 |
| N | -1.1555305 | -0.4508868 | 0.5861128  |
| H | -2.2138023 | 1.7093477  | 0.6156894  |
| H | -1.7642092 | -2.5598662 | 1.2691511  |

**3.2 Cartesian coordinates of the cytosine first excited state tautomers optimized at the B3LYP/def2-TZVPPD level.**

**(C1)**

|   |            |            |            |
|---|------------|------------|------------|
| C | -0.5720904 | 0.7506660  | 0.0566803  |
| C | 0.6899877  | 0.7685068  | -0.4735541 |
| C | 1.4312665  | -0.4131752 | -0.5528427 |
| N | -1.1311637 | -0.4189776 | 0.6046597  |
| N | 0.7990078  | -1.5786844 | -0.0502428 |
| C | -0.4292757 | -1.4813921 | 0.4920051  |
| N | -1.4371738 | 1.8168141  | 0.0865453  |
| O | -0.9234275 | -2.6339416 | 0.9464329  |
| H | -1.0511693 | 2.7378255  | -0.0325658 |
| H | -2.1778352 | 1.7445297  | 0.7653144  |
| H | 1.1174382  | 1.6878369  | -0.8500093 |
| H | 2.4690850  | -0.4961062 | -0.8148700 |
| H | 1.2153574  | -2.4838949 | -0.1775568 |

**(C2)**

|   |            |            |            |
|---|------------|------------|------------|
| C | -0.5751112 | 0.7495267  | 0.0399126  |
| C | 0.7022930  | 0.8030924  | -0.4754522 |
| C | 1.4648743  | -0.3941498 | -0.4753045 |
| N | -1.0911178 | -0.4261722 | 0.5417232  |
| N | 0.7926059  | -1.5165264 | -0.0322855 |
| C | -0.3926008 | -1.5563077 | 0.4744463  |
| N | -1.4496677 | 1.8173592  | 0.0759207  |
| O | -0.9629575 | -2.6768139 | 0.9343162  |
| H | -1.0332420 | 2.7313073  | 0.0132748  |
| H | -2.1770622 | 1.7483461  | 0.7706615  |
| H | 1.1127103  | 1.7257069  | -0.8615086 |
| H | 2.4183145  | -0.5265202 | -0.9547902 |
| H | -0.3373084 | -3.4042281 | 0.8311654  |

**(C3)**

|      |            |            |            |                                                                                                           |            |            |            |
|------|------------|------------|------------|-----------------------------------------------------------------------------------------------------------|------------|------------|------------|
| C    | -0.5838673 | 0.7430663  | 0.0537146  | O                                                                                                         | -0.9720096 | -2.6149005 | 0.9971937  |
| C    | 0.6919158  | 0.7863437  | -0.4701428 | H                                                                                                         | -1.1556008 | 2.6992528  | -0.2670787 |
| C    | 1.4648613  | -0.4084518 | -0.4501136 | H                                                                                                         | -1.8573818 | 2.0505372  | 1.0904614  |
| N    | -1.1270309 | -0.4104770 | 0.5797473  | N                                                                                                         | -1.1545228 | -0.4315798 | 0.5315378  |
| N    | 0.7624979  | -1.5064593 | -0.0170880 | H                                                                                                         | -2.1564621 | -0.5404921 | 0.5833196  |
| C    | -0.4150388 | -1.5443733 | 0.4979448  | H                                                                                                         | 2.3540975  | -0.4806230 | -0.8981547 |
| N    | -1.4363027 | 1.8275149  | 0.0781450  | H                                                                                                         | 1.0963876  | 1.6880350  | -0.7969820 |
| O    | -0.9296197 | -2.6931572 | 0.9459791  |                                                                                                           |            |            |            |
| H    | -1.0099658 | 2.7360543  | 0.0075589  | (C7)                                                                                                      |            |            |            |
| H    | -2.1770111 | 1.7711323  | 0.7592354  | C                                                                                                         | -0.5860091 | 0.7813592  | 0.1211593  |
| H    | 1.1059505  | 1.6977627  | -0.8775142 | C                                                                                                         | 0.7511053  | 0.7966933  | -0.2535395 |
| H    | 2.3961101  | -0.5616571 | -0.9657525 | C                                                                                                         | 1.3353929  | -0.4832415 | -0.5716499 |
| H    | -1.8229385 | -2.4942784 | 1.2552357  | N                                                                                                         | 0.8408653  | -1.6084536 | -0.1671900 |
| (C4) |            |            |            | C                                                                                                         | -0.2422351 | -1.4761567 | 0.7010072  |
| C    | -0.4249383 | 0.8551687  | 0.1568779  | N                                                                                                         | -1.4704768 | 1.7988731  | 0.1497561  |
| C    | 0.8299858  | 0.8010838  | -0.3748149 | O                                                                                                         | -0.8389317 | -2.6035789 | 1.1453611  |
| C    | 1.4656236  | -0.4347077 | -0.5171570 | H                                                                                                         | 1.2192642  | 1.7209915  | -0.5537720 |
| N    | 0.7795535  | -1.5792657 | -0.1145132 | H                                                                                                         | 2.1815151  | -0.5269063 | -1.2511298 |
| C    | -0.4740388 | -1.5863987 | 0.4433719  | N                                                                                                         | -1.1110380 | -0.4214482 | 0.5023367  |
| N    | -1.1988009 | 2.0225084  | 0.4246420  | H                                                                                                         | -2.1075093 | -0.5007731 | 0.6547979  |
| O    | -1.0446052 | -2.5893528 | 0.8197491  | H                                                                                                         | -1.0061791 | 2.6497667  | -0.1645908 |
| H    | 1.3281062  | 1.7079251  | -0.6764988 | H                                                                                                         | -0.2628333 | -3.3428845 | 0.9110833  |
| H    | 2.4662184  | -0.5687059 | -0.8859344 | (C8)                                                                                                      |            |            |            |
| H    | 1.2053188  | -2.4879747 | -0.1927602 | C                                                                                                         | -0.5895831 | 0.7126430  | 0.2786721  |
| N    | -1.0486673 | -0.3232858 | 0.5439559  | C                                                                                                         | 0.6064604  | 0.7698335  | -0.3916082 |
| H    | -1.9226092 | -0.2904406 | 1.0432684  | C                                                                                                         | 1.3433839  | -0.3964381 | -0.6038220 |
| H    | -1.7619266 | 2.1605267  | -0.4232768 | N                                                                                                         | 0.7854510  | -1.5843943 | -0.0961007 |
| (C5) |            |            |            | C                                                                                                         | -0.4013577 | -1.5463349 | 0.5397701  |
| C    | -0.5672684 | 0.7884425  | 0.2667690  | N                                                                                                         | -1.3832213 | 1.8504606  | 0.6144214  |
| C    | 0.6407418  | 0.8184152  | -0.3658482 | O                                                                                                         | -0.8293442 | -2.7458592 | 0.9607281  |
| C    | 1.3428458  | -0.3722236 | -0.5676395 | H                                                                                                         | 0.9926752  | 1.7154671  | -0.7406215 |
| N    | 0.7687393  | -1.5602115 | -0.1183745 | H                                                                                                         | 2.3211111  | -0.4578209 | -1.0427594 |
| C    | -0.4313212 | -1.6510119 | 0.5406442  | H                                                                                                         | 1.2464407  | -2.4719755 | -0.2040771 |
| N    | -1.3922060 | 1.9015936  | 0.6037794  | N                                                                                                         | -1.1032315 | -0.4855726 | 0.7546192  |
| O    | -0.9009621 | -2.6900904 | 0.9562641  | H                                                                                                         | -2.0374817 | 1.9424073  | -0.1717542 |
| H    | 1.0513321  | 1.7568013  | -0.7010388 | H                                                                                                         | -1.6734626 | -2.5964043 | 1.4082418  |
| H    | 2.3166168  | -0.4394036 | -1.0175096 |                                                                                                           |            |            |            |
| H    | 1.2449900  | -2.4388638 | -0.2376951 | 4 Guanine                                                                                                 |            |            |            |
| N    | -1.0780030 | -0.4290702 | 0.6960391  | 4.1 Cartesian coordinates of the guanine ground state tautomers optimized at the B3LYP/def2-TZVPPD level. |            |            |            |
| H    | -1.9085496 | -0.4545919 | 1.2650426  |                                                                                                           |            |            |            |
| H    | -2.0305853 | 2.0027849  | -0.1946129 | (G1)                                                                                                      |            |            |            |
| (C6) |            |            |            | C                                                                                                         | 0.8603259  | 1.5171163  | 0.0003127  |
| C    | -0.6270109 | 0.7869051  | 0.0711781  | C                                                                                                         | -0.5092664 | 1.1349543  | 0.0177967  |
| C    | 0.6530765  | 0.7682182  | -0.4384653 | C                                                                                                         | -0.9181391 | -0.1944639 | -0.0110093 |
| C    | 1.3612442  | -0.4156133 | -0.4848793 | N                                                                                                         | -1.6655846 | 1.8790158  | 0.0488984  |
| N    | 0.8302362  | -1.6041691 | 0.0414967  | N                                                                                                         | -0.0660254 | -1.2562686 | -0.0374470 |
| C    | -0.3567712 | -1.5473958 | 0.4868057  | N                                                                                                         | 1.6640799  | 0.3538385  | -0.0424029 |
| N    | -1.5151618 | 1.8556248  | 0.1532968  |                                                                                                           |            |            |            |



|             |            |            |            |             |            |            |            |
|-------------|------------|------------|------------|-------------|------------|------------|------------|
| C           | 1.1934267  | -0.9398757 | -0.0598477 | N           | -1.6721949 | 1.8926685  | 0.0223655  |
| C           | -2.6894842 | 0.9851678  | 0.0385491  | N           | -0.0828840 | -1.3089713 | -0.0308694 |
| N           | -2.2854065 | -0.2663634 | 0.0036779  | N           | 1.6796549  | 0.3397996  | -0.0211961 |
| H           | 2.6546252  | 0.5320269  | -0.1233041 | C           | 1.2010797  | -0.9252407 | -0.0411503 |
| N           | 2.1470363  | -1.9268475 | -0.1579583 | C           | -2.6771663 | 1.0635517  | 0.0210636  |
| O           | 1.3592957  | 2.6317873  | 0.0102387  | N           | -2.2855862 | -0.2623144 | 0.0013309  |
| H           | 3.0369363  | -1.7697117 | 0.2865848  | H           | -3.7183177 | 1.3427556  | 0.0334942  |
| H           | 1.7729228  | -2.8523669 | -0.0194756 | H           | -2.8829715 | -1.0713672 | -0.0060906 |
| H           | -1.7255890 | 2.8829199  | 0.0721755  | N           | 2.1421738  | -1.9089134 | -0.1041660 |
| H           | -3.7201542 | 1.3011286  | 0.0579813  | O           | 1.3138174  | 2.5820093  | 0.0216789  |
| <b>(G2)</b> |            |            |            | H           | 3.0947218  | -1.6533992 | 0.0829387  |
| C           | 0.8233548  | 1.5121386  | 0.0029142  | H           | 1.8485866  | -2.8518317 | 0.0754377  |
| C           | -0.5620697 | 1.1344789  | 0.0161459  | H           | 0.5735680  | 3.2030552  | 0.0360332  |
| C           | -0.8850080 | -0.2176737 | -0.0126945 | <b>(G5)</b> |            |            |            |
| N           | -1.7032194 | 1.9074247  | 0.0460982  | C           | 0.8667419  | 1.3583253  | -0.0016552 |
| N           | -0.0591928 | -1.2897213 | -0.0379912 | C           | -0.5009022 | 1.1237868  | 0.0042571  |
| N           | 1.6415636  | 0.3351203  | -0.0376938 | C           | -0.9305245 | -0.2136323 | -0.0092647 |
| C           | 1.2042134  | -0.9587780 | -0.0576717 | N           | -1.6528777 | 1.8854639  | 0.0324607  |
| C           | -2.6857994 | 1.0537135  | 0.0367930  | N           | -0.0900167 | -1.2514333 | -0.0338816 |
| N           | -2.2501532 | -0.2567137 | 0.0018070  | N           | 1.7066725  | 0.3463803  | -0.0281458 |
| H           | -3.7348377 | 1.3010571  | 0.0539062  | C           | 1.1946463  | -0.9117839 | -0.0500782 |
| H           | -2.8131388 | -1.0903202 | -0.0129097 | C           | -2.6859642 | 0.9947324  | 0.0338463  |
| H           | 2.6293535  | 0.5344020  | -0.1036303 | N           | -2.3073243 | -0.2591524 | 0.0106229  |
| N           | 2.1594255  | -1.9384252 | -0.1500863 | N           | 2.1145815  | -1.9209334 | -0.1276326 |
| O           | 1.3552390  | 2.6016576  | 0.0149152  | O           | 1.3491084  | 2.6170455  | 0.0224704  |
| H           | 3.0709777  | -1.7584607 | 0.2362451  | H           | 3.0653155  | -1.7003922 | 0.1082776  |
| H           | 1.8093059  | -2.8698989 | 0.0038523  | H           | 1.7828937  | -2.8483027 | 0.0711995  |
| <b>(G3)</b> |            |            |            | H           | -1.7179408 | 2.8880324  | 0.0470149  |
| C           | 0.8314355  | 1.3442132  | 0.0056237  | H           | -3.7121324 | 1.3273982  | 0.0523393  |
| C           | -0.5468874 | 1.1058239  | 0.0082289  | H           | 2.3141026  | 2.5512217  | 0.0084593  |
| C           | -0.8997369 | -0.2503456 | -0.0123293 | <b>(G6)</b> |            |            |            |
| N           | -1.6736894 | 1.9095358  | 0.0325987  | C           | 0.8703983  | 1.4773431  | -0.0068545 |
| N           | -0.0773602 | -1.2942045 | -0.0363329 | C           | -0.5153017 | 1.1193280  | 0.0089334  |
| N           | 1.6862766  | 0.3355783  | -0.0205281 | C           | -0.9517136 | -0.1861582 | -0.0151697 |
| C           | 1.2070123  | -0.9277390 | -0.0461095 | N           | -1.6694636 | 1.8749398  | 0.0480228  |
| C           | -2.6687428 | 1.0729016  | 0.0269563  | N           | -0.0735015 | -1.2303636 | -0.0566252 |
| N           | -2.2692015 | -0.2517470 | 0.0010353  | N           | 1.6761167  | 0.3256617  | -0.0497458 |
| H           | -3.7122617 | 1.3441804  | 0.0405123  | C           | 1.2979041  | -1.0240761 | -0.0758342 |
| H           | -2.8572818 | -1.0673409 | -0.0113513 | C           | -2.7020493 | 1.0019854  | 0.0451366  |
| N           | 2.1419555  | -1.9200550 | -0.1186741 | N           | -2.3065368 | -0.2614440 | 0.0072237  |
| O           | 1.3177989  | 2.5903405  | 0.0325474  | H           | 2.6669373  | 0.5145047  | -0.0631078 |
| H           | 3.0921165  | -1.6778425 | 0.0968026  | N           | 2.0786118  | -2.0310035 | -0.1140307 |
| H           | 1.8349908  | -2.8567485 | 0.0733808  | O           | 1.3553032  | 2.5953043  | 0.0122620  |
| H           | 2.2822055  | 2.5171488  | 0.0211991  | H           | -1.7138471 | 2.8798016  | 0.0735766  |
| <b>(G4)</b> |            |            |            | H           | -3.7301969 | 1.3229524  | 0.0713335  |
| C           | 0.8192263  | 1.3345626  | -0.0007731 | H           | 3.0583414  | -1.7713307 | -0.1250474 |
| C           | -0.5563398 | 1.0760188  | 0.0010743  | H           | -0.3908519 | -2.1859361 | -0.0738432 |
| C           | -0.9128774 | -0.2727940 | -0.0124814 | <b>(G7)</b> |            |            |            |

|   |            |            |            |   |            |            |            |
|---|------------|------------|------------|---|------------|------------|------------|
| C | 0.8670687  | 1.4761696  | -0.0045841 | O | 1.3707515  | 2.6499762  | 0.0174827  |
| C | -0.5232378 | 1.1167326  | 0.0098239  | H | 3.0680098  | -1.7927037 | 0.1759897  |
| C | -0.9594815 | -0.1856251 | -0.0146128 | H | 1.7321823  | -2.8500023 | -0.1312410 |
| N | -1.6766512 | 1.8713486  | 0.0475374  | H | -1.7003454 | 2.8836315  | -0.0122957 |
| N | -0.0759519 | -1.2333253 | -0.0552257 | H | -3.7449667 | 1.2827683  | 0.0163361  |
| N | 1.6687519  | 0.3315553  | -0.0468461 |   |            |            |            |
| C | 1.2983784  | -1.0157375 | -0.0755609 |   |            |            |            |
| C | -2.7104902 | 0.9993342  | 0.0436308  |   |            |            |            |
| N | -2.3134497 | -0.2642108 | 0.0062235  |   |            |            |            |
| H | 2.6665390  | 0.4859698  | -0.0612983 |   |            |            |            |
| N | 2.2164796  | -1.8991827 | -0.1161350 |   |            |            |            |
| O | 1.3393600  | 2.5994351  | 0.0158074  |   |            |            |            |
| H | -1.7197550 | 2.8764309  | 0.0728448  |   |            |            |            |
| H | -3.7384060 | 1.3204846  | 0.0686367  |   |            |            |            |
| H | 1.8514714  | -2.8450660 | -0.1337748 |   |            |            |            |
| H | -0.4210148 | -2.1779145 | -0.0748867 |   |            |            |            |

**(G8)**

|   |            |            |            |
|---|------------|------------|------------|
| C | 0.8886994  | 1.4338532  | 0.0147170  |
| C | -0.5205853 | 1.0985568  | 0.0267617  |
| C | -0.9845165 | -0.1906154 | -0.0068523 |
| N | -1.6637866 | 1.8657691  | 0.0527817  |
| N | -0.0860912 | -1.2308280 | -0.0393649 |
| N | 1.7184465  | 0.3095783  | -0.0057948 |
| C | 1.2486720  | -0.9004300 | -0.0450332 |
| C | -2.7155471 | 1.0104871  | 0.0320284  |
| N | -2.3392003 | -0.2585369 | -0.0041899 |
| N | 2.1210379  | -1.9581083 | -0.1398992 |
| O | 1.3155563  | 2.5777177  | 0.0292257  |
| H | 3.0822357  | -1.6946580 | 0.0068711  |
| H | 1.8550969  | -2.8370893 | 0.2730783  |
| H | -1.6867763 | 2.8717299  | 0.0804930  |
| H | -3.7383193 | 1.3485076  | 0.0447808  |
| H | -0.4056810 | -2.1746749 | -0.1840232 |

**4.2 Cartesian coordinates of the guanine first excited state tautomers optimized at the B3LYP/def2-TZVPPD level.**

**(G1)**

|   |            |            |            |
|---|------------|------------|------------|
| C | 0.8625848  | 1.5252445  | 0.0706532  |
| C | -0.4958570 | 1.1483672  | 0.0397569  |
| C | -0.9455889 | -0.2228958 | 0.0333423  |
| N | -1.6432625 | 1.8799988  | 0.0251314  |
| N | -0.0781548 | -1.2397078 | 0.0100898  |
| N | 1.7425947  | 0.3643241  | 0.1554201  |
| C | 1.2143236  | -0.9043988 | 0.0305248  |
| C | -2.7202207 | 0.9548173  | 0.0129886  |
| N | -2.3016796 | -0.2867708 | 0.0175981  |
| H | 2.6444823  | 0.5353486  | -0.2950327 |
| N | 2.1041462  | -1.9159394 | -0.0819742 |

**(G2)**

|   |            |            |            |
|---|------------|------------|------------|
| C | 0.8497475  | 1.4910773  | 0.0038080  |
| C | -0.5668937 | 1.1339701  | 0.0064210  |
| C | -0.9042833 | -0.2571050 | 0.0017357  |
| N | -1.6666385 | 1.8987496  | 0.0126270  |
| N | -0.1132754 | -1.2879155 | -0.0052534 |
| N | 1.6560872  | 0.3353686  | -0.0034484 |
| C | 1.2245172  | -0.9528190 | -0.0081090 |
| C | -2.6813914 | 1.0403314  | 0.0122242  |
| N | -2.2834310 | -0.2623086 | 0.0059102  |
| H | -3.7209271 | 1.3240332  | 0.0164234  |
| H | -2.8679792 | -1.0826879 | 0.0042351  |
| H | 2.6873141  | 0.4564152  | -0.0051789 |
| N | 2.1124972  | -1.9066462 | -0.0151855 |
| O | 1.3168169  | 2.6010016  | 0.0073125  |
| H | 3.1535340  | -1.6540538 | -0.0159523 |
| H | 1.8043199  | -2.8774101 | -0.0175702 |

**(G3)**

|   |            |            |            |
|---|------------|------------|------------|
| C | 0.8714340  | 1.4020916  | -0.2724426 |
| C | -0.5479280 | 1.1202418  | -0.0807582 |
| C | -0.8939283 | -0.2372482 | 0.1206977  |
| N | -1.6595877 | 1.8666294  | -0.2081465 |
| N | -0.0770969 | -1.2877220 | 0.0572397  |
| N | 1.7183905  | 0.3417376  | -0.2055867 |
| C | 1.2214328  | -0.8876756 | -0.0588058 |
| C | -2.6900712 | 1.0291586  | -0.0581200 |
| N | -2.2772924 | -0.2534289 | 0.0971819  |
| H | -3.7259812 | 1.3207834  | -0.0258840 |
| H | -2.8558065 | -1.0695998 | 0.2106786  |
| N | 2.1128608  | -1.9023742 | -0.0323803 |
| O | 1.3402887  | 2.6000153  | 0.1813464  |
| H | 3.0942403  | -1.6996085 | -0.1098134 |
| H | 1.7817568  | -2.8450787 | 0.0749762  |
| H | 2.2759185  | 2.4757776  | 0.4033771  |

**(G4)**

|   |            |            |            |
|---|------------|------------|------------|
| C | 0.8524710  | 1.3926227  | -0.2087045 |
| C | -0.5622586 | 1.0850050  | -0.0600679 |
| C | -0.9146652 | -0.2774082 | 0.0567438  |
| N | -1.6643394 | 1.8596495  | -0.1091167 |
| N | -0.0877851 | -1.3190805 | -0.0143266 |
| N | 1.7056018  | 0.3461929  | -0.0857086 |
| C | 1.2131573  | -0.8857037 | -0.0305127 |
| C | -2.7008214 | 1.0176161  | -0.0277865 |

---

|   |            |            |           |
|---|------------|------------|-----------|
| N | -2.2948411 | -0.2787482 | 0.0411448 |
| H | -3.7372053 | 1.3070781  | 0.0045809 |
| H | -2.8827239 | -1.0934932 | 0.1070223 |
| N | 2.1115195  | -1.8969753 | 0.0058972 |
| O | 1.3343378  | 2.5964209  | 0.2295714 |
| H | 3.0942458  | -1.6824043 | 0.0139227 |
| H | 1.7814539  | -2.8464187 | 0.0280028 |
| H | 0.6363436  | 3.2552362  | 0.1280275 |

**(G5)**

|   |            |            |            |
|---|------------|------------|------------|
| C | 0.8741641  | 1.3796216  | 0.0093924  |
| C | -0.4921694 | 1.1253407  | 0.0146130  |
| C | -0.9586562 | -0.2331344 | 0.0112773  |
| N | -1.6250093 | 1.8767868  | 0.0222565  |
| N | -0.0799074 | -1.2623833 | 0.0025645  |
| N | 1.7624845  | 0.3512326  | 0.0020216  |
| C | 1.2082945  | -0.8675694 | -0.0007746 |
| C | -2.7262977 | 0.9703951  | 0.0202526  |
| N | -2.3021275 | -0.2868876 | 0.0153195  |
| N | 2.0851962  | -1.9097351 | -0.0084086 |
| O | 1.3547720  | 2.6463323  | 0.0134960  |
| H | 3.0758838  | -1.7313298 | -0.0112810 |
| H | 1.7181157  | -2.8476859 | -0.0107949 |
| H | -1.6720849 | 2.8803482  | 0.0199361  |
| H | -3.7451841 | 1.3100077  | 0.0295154  |
| H | 2.3189053  | 2.5854170  | 0.0109042  |

**(G6)**

|   |            |            |            |
|---|------------|------------|------------|
| C | 0.8358017  | 1.5389785  | -0.0047821 |
| C | -0.5037011 | 1.1611565  | 0.0095083  |
| C | -0.9713209 | -0.1664199 | -0.0145968 |
| N | -1.6788605 | 1.8919250  | 0.0483204  |
| N | -0.0423873 | -1.2241338 | -0.0568142 |
| N | 1.6917853  | 0.2805047  | -0.0510751 |
| C | 1.2646959  | -0.9710657 | -0.0738585 |
| C | -2.7426653 | 0.9811674  | 0.0454253  |
| N | -2.2901812 | -0.2731375 | 0.0065923  |
| H | 2.6833425  | 0.4649640  | -0.0641925 |
| N | 2.0690823  | -2.0746770 | -0.1146360 |
| O | 1.4371066  | 2.6153619  | 0.0111522  |
| H | -1.7360015 | 2.8937293  | 0.0745923  |
| H | -3.7727631 | 1.2816043  | 0.0712030  |
| H | 3.0473066  | -1.7912534 | -0.1258238 |
| H | -0.3410896 | -2.1871957 | -0.0747849 |

**(G7)**

|   |            |            |            |
|---|------------|------------|------------|
| C | 0.8286049  | 1.5501354  | -0.0012639 |
| C | -0.5058855 | 1.1654460  | 0.0108493  |
| C | -0.9659698 | -0.1652424 | -0.0156603 |
| N | -1.6897606 | 1.8885701  | 0.0483204  |
| N | -0.0357927 | -1.2241516 | -0.0577074 |

|   |            |            |            |
|---|------------|------------|------------|
| N | 1.6906811  | 0.2869914  | -0.0495747 |
| C | 1.2735553  | -0.9615048 | -0.0747569 |
| C | -2.7450631 | 0.9696398  | 0.0431535  |
| N | -2.2846198 | -0.2811619 | 0.0033453  |
| H | 2.6880060  | 0.4424060  | -0.0651130 |
| N | 2.2193300  | -1.9509293 | -0.1195063 |
| O | 1.4260728  | 2.6260306  | 0.0162902  |
| H | -1.7550148 | 2.8896423  | 0.0778779  |
| H | -3.7779186 | 1.2612825  | 0.0677098  |
| H | 1.7697870  | -2.8654005 | -0.1259587 |
| H | -0.3664015 | -2.1753543 | -0.0764250 |

**(G8)**

|   |            |            |            |
|---|------------|------------|------------|
| C | 0.8479036  | 1.3534510  | 0.0230713  |
| C | -0.5160412 | 1.1258113  | 0.0350780  |
| C | -0.9994551 | -0.1906391 | 0.0082880  |
| N | -1.6696827 | 1.8932759  | 0.0546708  |
| N | -0.0836792 | -1.2366418 | -0.0182603 |
| N | 1.7136210  | 0.3021043  | 0.0062262  |
| C | 1.2555871  | -0.9135160 | -0.0410581 |
| C | -2.7429766 | 1.0165800  | 0.0333508  |
| N | -2.3266635 | -0.2542937 | 0.0074409  |
| N | 2.1269101  | -1.9736270 | -0.1540320 |
| O | 1.3829547  | 2.5828481  | 0.0306976  |
| H | 3.0911592  | -1.6990317 | -0.0486088 |
| H | 1.8884050  | -2.8113179 | 0.3561068  |
| H | -1.7190176 | 2.8951291  | 0.0654300  |
| H | -3.7658096 | 1.3440080  | 0.0416442  |
| H | -0.3939741 | -2.1628814 | -0.2644651 |
